# Supplementary material for: Non-cross-linked polystyrene-supported 2-imidazolidinone chiral auxiliary: synthesis and application in asymmetric alkylation reactions
Source: publisher site journal article supplement (doi:10.3762/bjoc.9.248), 2013-10-15
Supplement: Additional file 1 [file 1860-5397-9-248-S1.pdf]

## Supporting Information

for

### **Non-cross-linked polystyrene-supported 2-imidazolidinone chiral auxiliary: synthesis and application in asymmetric alkylation reactions**

Quynh Pham Bao Nguyen and Taek Hyeon Kim\*<sup>§</sup>

Address: School of Applied Chemistry and Center for Functional Nano Fine Chemicals,  
Chonnam National University, Gwangju 500-757, Republic of Korea

Email: Taek Hyeon Kim\* - thkim@chonnam.ac.kr

\* Corresponding author

<sup>§</sup> Tel: +82 62 530 1891; Fax: +82 62 530 1889

**<sup>1</sup>H NMR spectra of 3, 5a, 6a, 7a–d, and HPLC data of 7a–d**

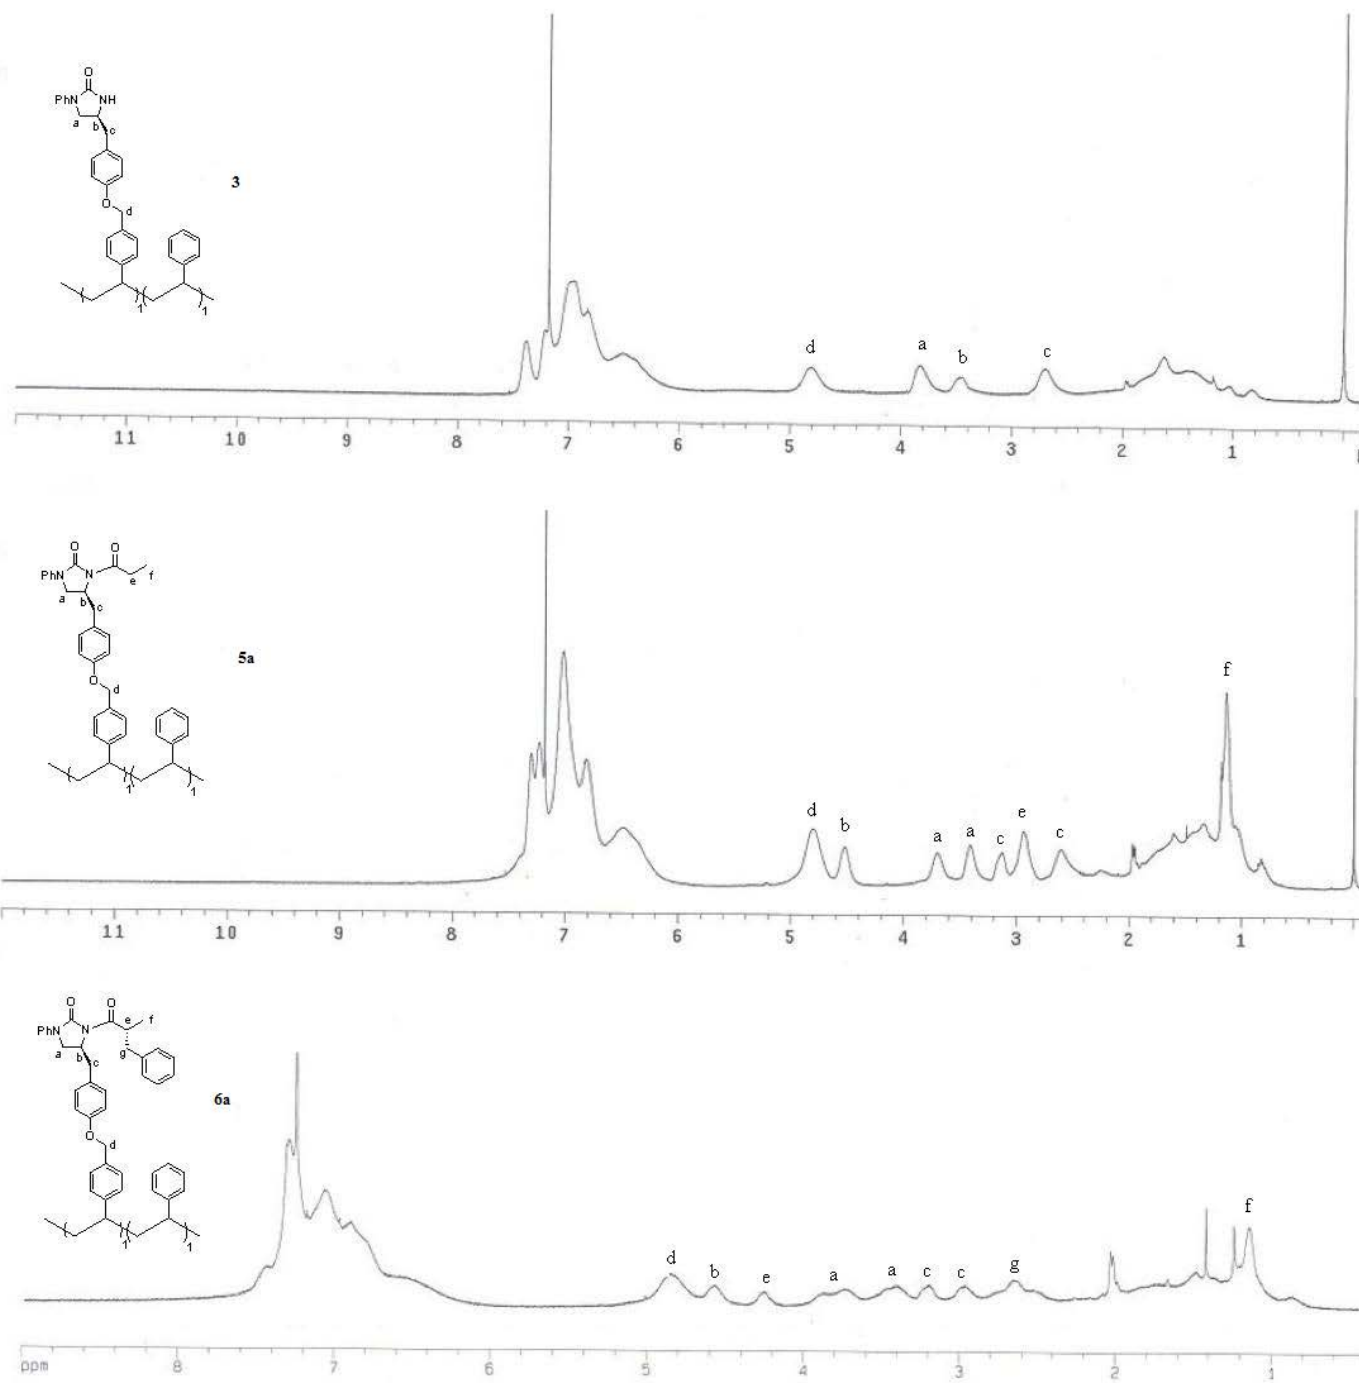

**Figure S1:**  $^1\text{H}$  NMR spectra (300 MHz,  $\text{CDCl}_3$ ) of polymers **3**, **5a** and **6a**.

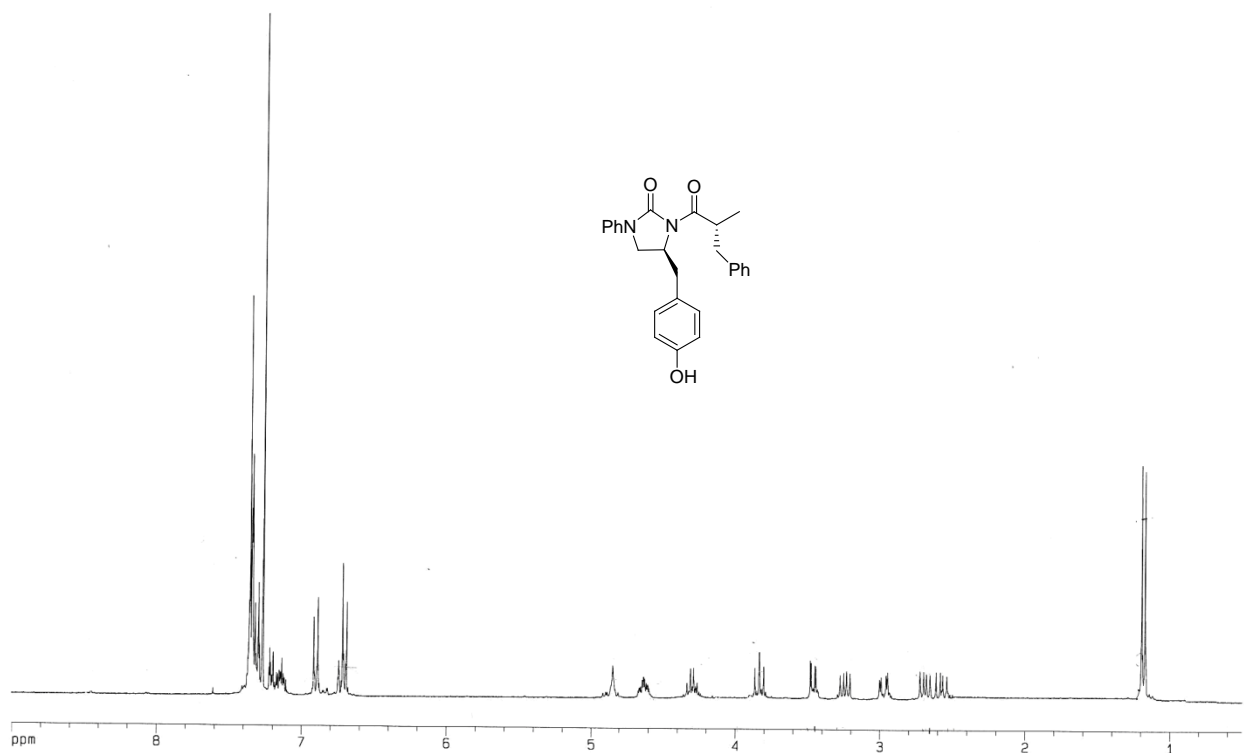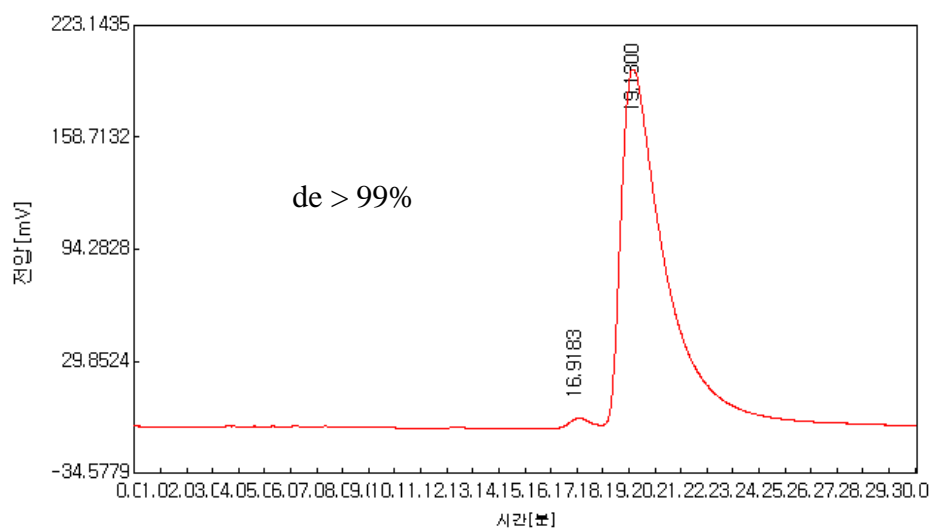

**Figure S2:**  $^1\text{H}$  NMR and HPLC data of compound **7a**.

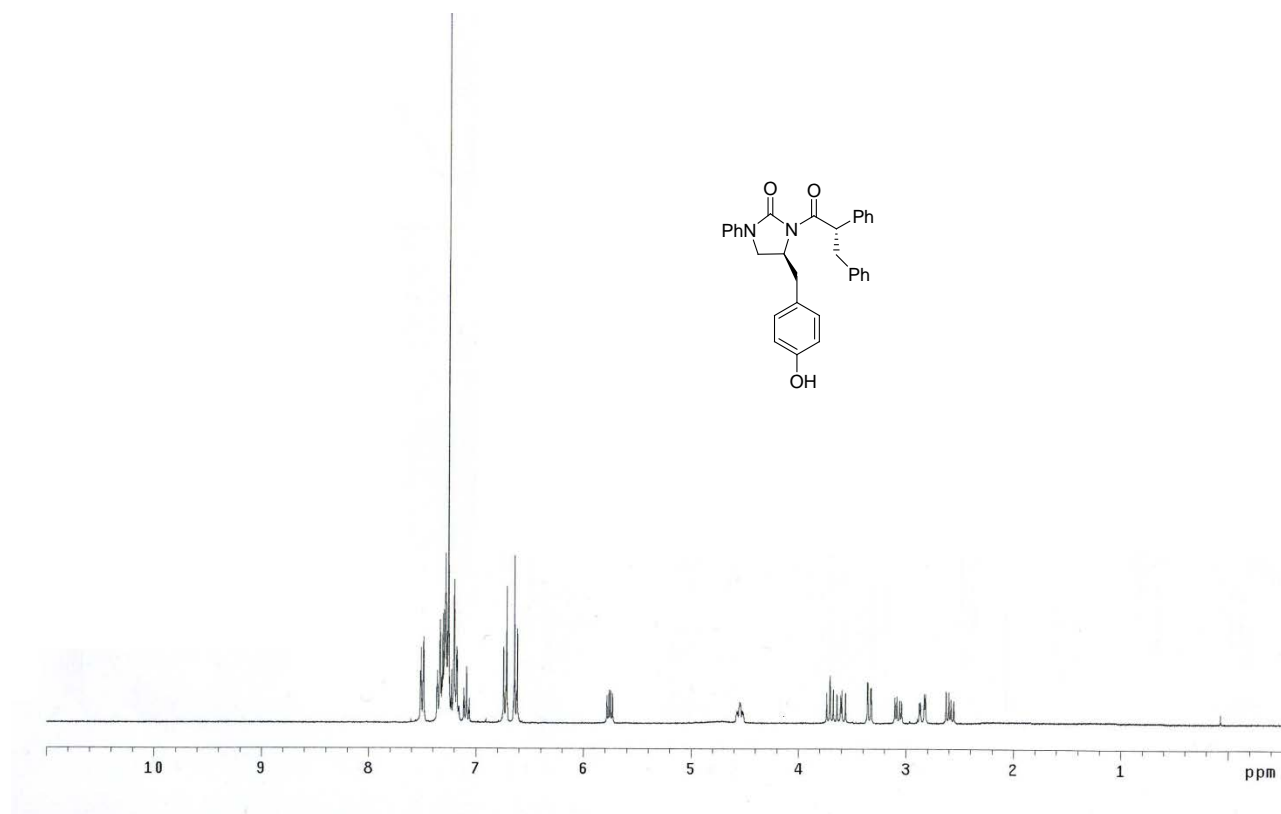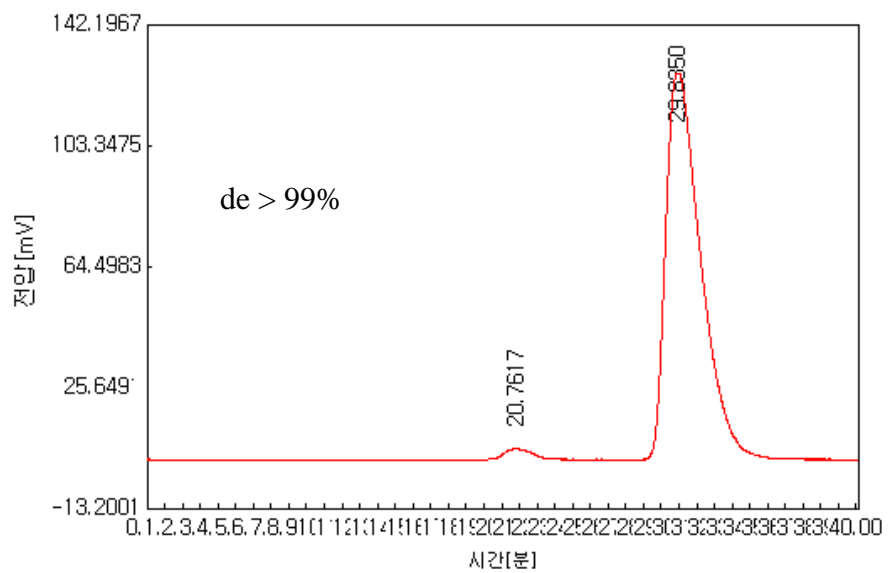

**Figure S3:**  $^1\text{H}$  NMR and HPLC data of compound **7b**.

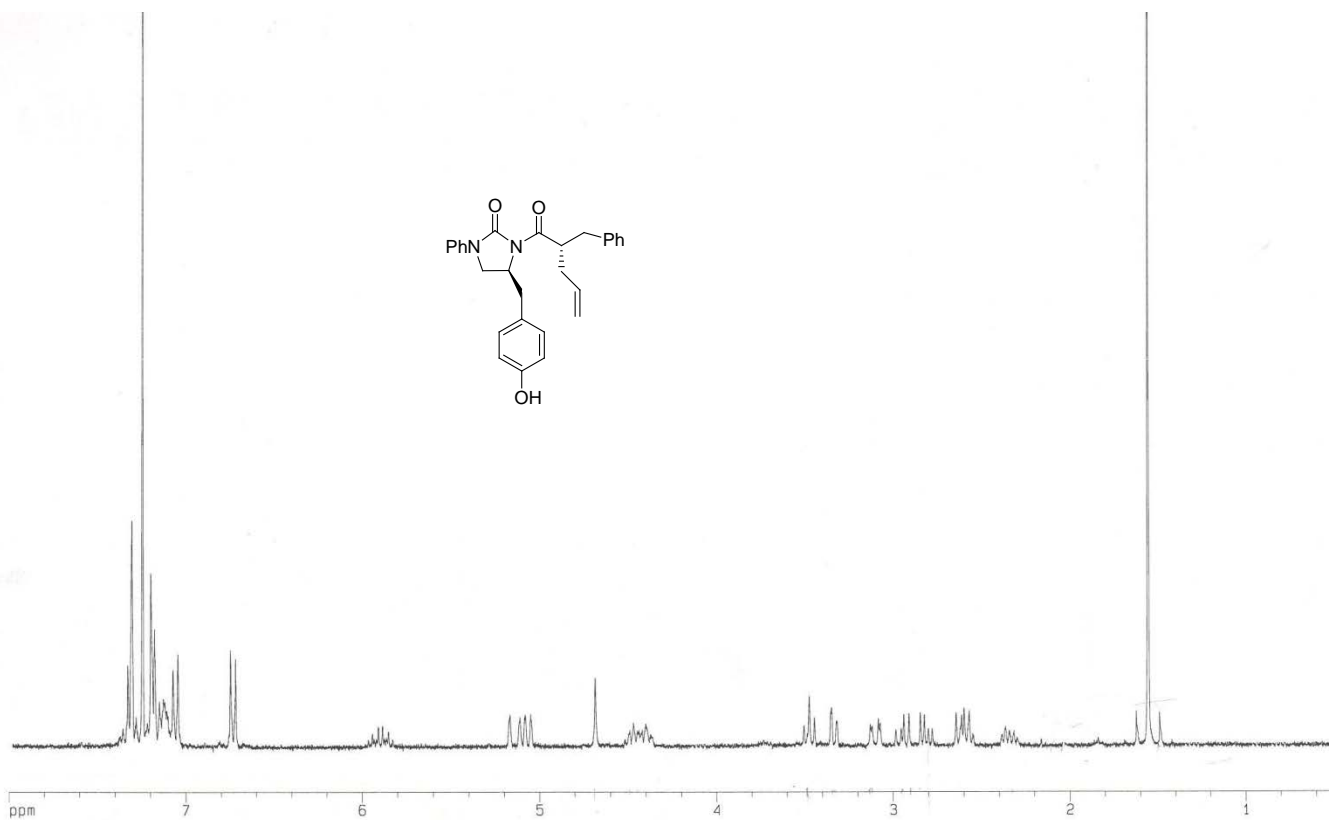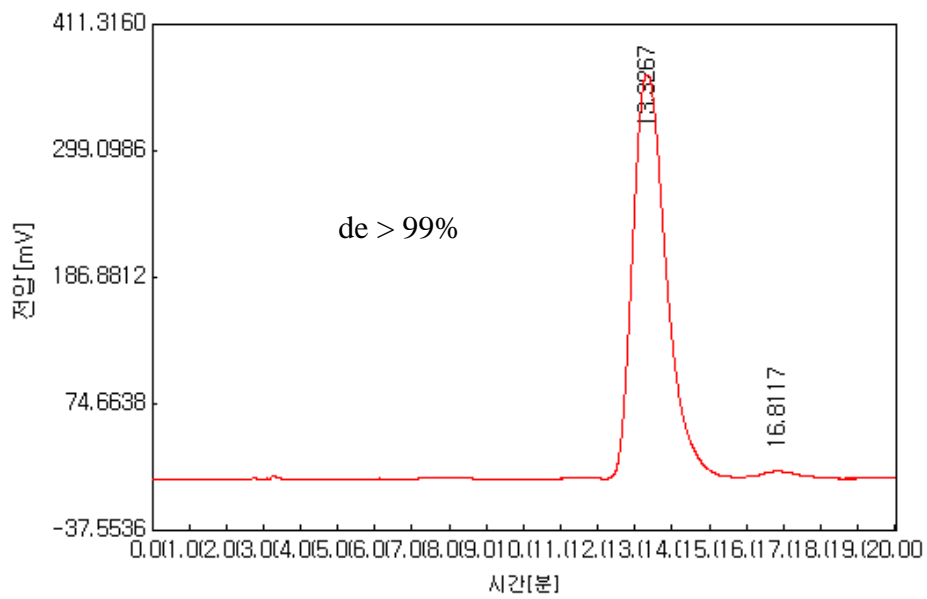

**Figure S4:**  $^1\text{H}$  NMR and HPLC data of compound **7c**.

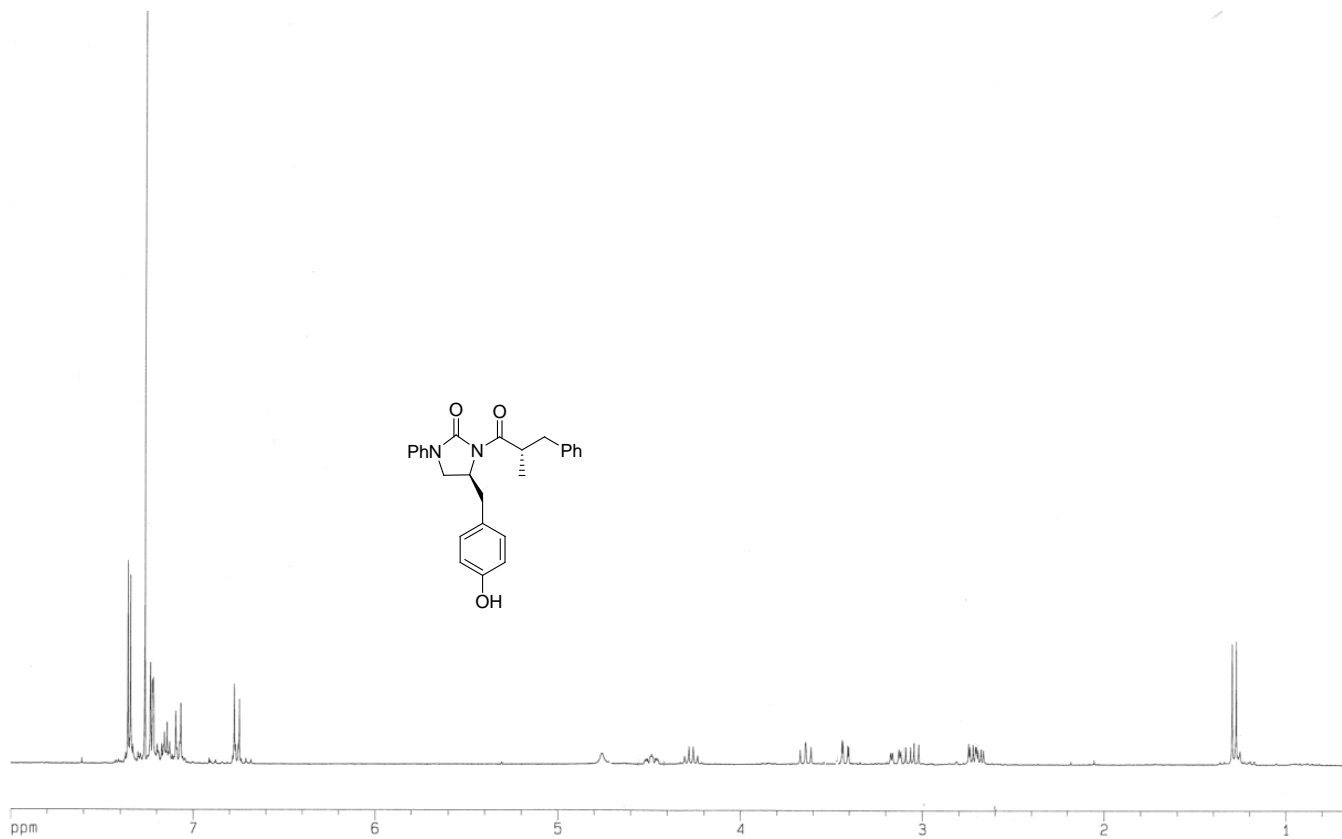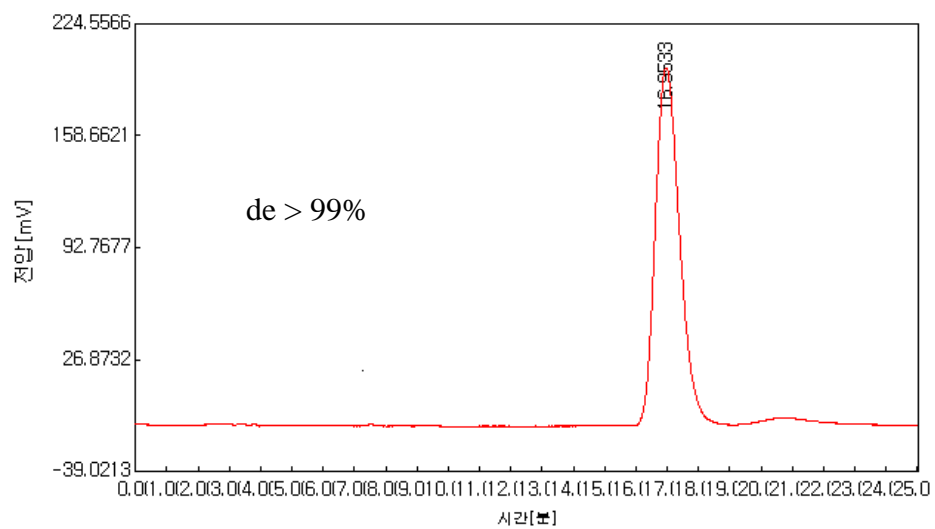

**Figure S5:**  $^1\text{H}$  NMR and HPLC data of compound **7d**.
